# Supplementary material for: Preanalytical Variables in the Analysis of Mitochondrial DNA in Whole Blood and Plasma from Pancreatic Cancer Patients
Source: MDPI journal article supplement (doi:10.3390/diagnostics12081905), 2022-08-06
Supplement: s1 [file s1]

**Table S1.** Mitochondrial DNA copy number (CN) in WB stored at different temperatures prior to processing.

| Cohort           | Tube    | Subject | Room temperature |          | -20°C    |          | Fold change in CN (-20°C/RT) |
|------------------|---------|---------|------------------|----------|----------|----------|------------------------------|
|                  |         |         | MTTL1 CN         | Stdev    | MTTL1 CN | Stdev    |                              |
| Healthy subjects | EDTA    | 1       | 4,67E+03         | 3,68E+02 | 4,90E+05 | 1,85E+05 | 104,92                       |
|                  |         | 2*      | 6,43E+04         | 7,21E+03 | 3,10E+06 | 3,08E+06 | 48,33                        |
|                  |         | 3       | 3,35E+04         | 2,27E+04 | 5,81E+05 | 2,49E+05 | 17,33                        |
|                  |         | 4       | 8,66E+04         | 4,47E+04 | 8,03E+05 | 8,66E+04 | 9,27                         |
|                  |         | 5       | 9,68E+04         | 4,07E+04 | 6,58E+05 | 2,47E+05 | 6,80                         |
|                  |         | 6       | 1,03E+04         | 4,53E+03 | 5,80E+05 | 1,61E+05 | 56,50                        |
|                  |         | 7       | 5,10E+03         | 1,73E+03 | 4,01E+05 | 9,45E+04 | 78,48                        |
|                  |         | 8       | 3,66E+03         | 1,97E+03 | 2,28E+05 | 2,44E+05 | 62,22                        |
|                  |         | 9       | 2,27E+05         | 2,13E+05 | 1,22E+06 | 4,72E+05 | 5,36                         |
|                  |         | 10      | 1,21E+05         | 1,08E+04 | 1,35E+06 | 2,95E+05 | 11,13                        |
|                  | PAXgene | 1       | 4,77E+05         | 1,29E+05 | 8,08E+05 | 4,05E+05 | 1,69                         |
|                  |         | 2*      | 1,04E+07         | 5,01E+05 | 3,50E+06 | 9,88E+05 | 0,34                         |
|                  |         | 3       | 8,14E+04         | 9,00E+03 | 1,23E+06 | 7,88E+05 | 15,13                        |
|                  |         | 4       | 4,80E+05         | 4,09E+05 | 4,67E+05 | 1,53E+04 | 0,97                         |
|                  |         | 5       | 3,66E+05         | 7,94E+04 | 6,47E+05 | 3,49E+05 | 1,77                         |
|                  |         | 6       | 6,50E+04         | 3,41E+04 | 5,09E+05 | 2,53E+04 | 7,84                         |
|                  |         | 7       | 6,78E+04         | 3,86E+04 | 3,66E+05 | 1,36E+05 | 5,40                         |
|                  |         | 8       | 1,57E+04         | 1,35E+04 | 2,87E+05 | 7,14E+03 | 18,27                        |
|                  |         | 9       | 4,21E+05         | 1,67E+05 | 1,15E+06 | 2,39E+05 | 2,73                         |
|                  |         | 10      | 5,56E+05         | 2,20E+04 | 1,79E+06 | 2,18E+05 | 3,22                         |
| Cancer patients  | EDTA    | 1       | 3,10E+05         | 7,03E+04 | 5,79E+05 | 1,87E+04 | 1,87                         |
|                  |         | 2       | 1,24E+06         | 5,67E+05 | 1,49E+06 | 1,30E+05 | 1,20                         |
|                  |         | 3       | 1,57E+06         | 7,26E+05 | 1,39E+06 | 2,71E+04 | 0,88                         |
|                  |         | 4       | 1,05E+06         | 3,50E+05 | 8,05E+05 | 1,91E+05 | 0,77                         |
|                  |         | 5*      | 1,49E+06         | 2,98E+05 | 3,66E+06 | 1,26E+05 | 2,45                         |
|                  |         | 6       | 4,06E+05         | 5,19E+04 | 6,72E+05 | 1,16E+05 | 1,66                         |
|                  |         | 7       | 6,31E+05         | 2,09E+05 | 5,83E+05 | 1,56E+05 | 0,92                         |
|                  |         | 8       | 7,85E+05         | 1,61E+05 | 1,21E+06 | 2,58E+05 | 1,54                         |
|                  |         | 9       | 1,24E+05         | 1,04E+05 | 1,43E+06 | 1,63E+04 | 11,51                        |
|                  |         | 10      | 3,24E+05         | 1,08E+05 | 7,39E+05 | 5,63E+04 | 2,28                         |
|                  | PAXgene | 1       | 4,89E+05         | 2,24E+05 | 6,30E+05 | 5,07E+04 | 1,29                         |
|                  |         | 2       | 6,67E+05         | 2,46E+05 | 1,34E+06 | 9,48E+04 | 2,00                         |
|                  |         | 3       | 1,53E+06         | 4,90E+05 | 1,82E+06 | 1,32E+05 | 1,19                         |
|                  |         | 4       | 6,09E+05         | 1,04E+05 | 5,92E+05 | 5,74E+04 | 0,97                         |
|                  |         | 5*      | 2,20E+06         | 1,06E+06 | 2,42E+06 | 1,43E+05 | 1,10                         |
|                  |         | 6       | 8,37E+05         | 3,35E+04 | 8,88E+05 | 1,82E+05 | 1,06                         |
|                  |         | 7       | 3,19E+05         | 1,20E+05 | 6,53E+05 | 6,76E+04 | 2,05                         |
|                  |         | 8       | 8,82E+05         | 2,57E+05 | 9,81E+05 | 1,29E+05 | 1,11                         |
|                  |         | 9       | 9,42E+05         | 8,23E+05 | 1,39E+06 | 4,07E+04 | 1,47                         |
|                  |         | 10      | 4,73E+05         | 2,97E+04 | 1,20E+06 | 2,24E+05 | 2,53                         |

\*Significant outliers, as determined by the Grubb's test.
